# Supplementary material for: Tuberculosis Surveillance and Monitoring under the National Public-Private Mix Tuberculosis Control Project in South Korea 2016–2017
Source: PubMed Central journal article supplement — Tuberc Respir Dis (Seoul). 2020 Jun 18;83(3):218–27. doi: 10.4046/trd.2020.0016 (PMC7362746; doi:10.4046/trd.2020.0016), 2020-06-18
Supplement: trd-2020-0016-suppl.pdf [file trd-2020-0016-suppl.pdf]

**Supplementary Table 1. Treatment success rate among the smear-positive drug-susceptible pulmonary TB cohort by administrative regions 2016–2017**

| Administrative regions* | Treatment success rate among smear-positive drug-susceptible pulmonary TB cohort <sup>†</sup> (%) |      |
|-------------------------|---------------------------------------------------------------------------------------------------|------|
|                         | 2016                                                                                              | 2017 |
| Seoul                   | 84.3                                                                                              | 84.5 |
| Busan                   | 84.2                                                                                              | 86.3 |
| Daegu                   | 82.5                                                                                              | 84.6 |
| Incheon                 | 85.2                                                                                              | 87.2 |
| Gwangju                 | 81.7                                                                                              | 88.3 |
| Daejeon                 | 84.5                                                                                              | 83.8 |
| Ulsan                   | 91.0                                                                                              | 89.6 |
| Gyeonggi-do             | 82.1                                                                                              | 85.4 |
| Gangwon-do              | 79.8                                                                                              | 78.7 |
| Chungcheongbuk-do       | 87.1                                                                                              | 85.3 |
| Chungcheongnam-do       | 79.4                                                                                              | 81.6 |
| Jeollabuk-do            | 91.7                                                                                              | 91.4 |
| Jeollanam-do            | 91.9                                                                                              | 86.7 |
| Gyeongsangbuk-do        | 81.0                                                                                              | 80.6 |
| Gyeongsangnam-do        | 77.4                                                                                              | 73.0 |
| Jeju                    | 81.1                                                                                              | 83.7 |
| Total                   | 83.1                                                                                              | 83.4 |

\*Administrative regions were classified according to the location of the hospital, where tuberculosis patients were diagnosed and treated. Thus, the indicators presented in this table are different from the indicators managed by the public health center of the designated administrative regions. <sup>†</sup>To report the treatment success rate among the smear-positive drug-susceptible pulmonary TB cohort, we included cases with resistance to isoniazid, ethambutol, and/or pyrazinamide but without resistance to rifampicin in the drug-susceptible cohort.

TB: tuberculosis.
